# Supplementary material for: Racial and Ethnic Disparities in Postpartum Care in the Greater Boston Area During the COVID-19 Pandemic
Source: PubMed Central journal article supplement (PMC9226999; doi:10.1001/jamanetworkopen.2022.16355), 2022-06-23
Supplement: jamanetwopen-e2216355-s001.pdf [file jamanetwopen-e2216355-s001.pdf]

## Supplemental Online Content

Mi T, Hung P, Li X, McGregor A, He J, Zhou J. Racial and ethnic disparities in postpartum care in the greater Boston area during the COVID-19 pandemic. *JAMA Netw Open*. 2022;5(6):e2216355. doi:10.1001/jamanetworkopen.2022.16355

**eTable.** Full Model of Multinomial Logistic Regression With Covariates

This supplemental material has been provided by the authors to give readers additional information about their work.

**eTable. Full Model of Multinomial Logistic Regression With Covariates**

|                                                                                | Canceled vs. Attended                 |                 | Non-scheduled vs. Attended            |                 |
|--------------------------------------------------------------------------------|---------------------------------------|-----------------|---------------------------------------|-----------------|
|                                                                                | Average marginal effects (%) (95% CI) | P-value         | Average marginal effects (%) (95% CI) | P-value         |
| <b>Race and ethnicity</b>                                                      |                                       |                 |                                       |                 |
| Asian                                                                          | -1.2 (-2.3, 0.0)                      | <b>.05</b>      | -1.1 (-2.1, -0.1)                     | <b>.03</b>      |
| Black                                                                          | 1.9 (-0.4, 4.2)                       | .11             | 1.6 (0.2, 3.0)                        | <b>.02</b>      |
| Hispanic                                                                       | 1.9 (-0.2, 4.0)                       | .07             | 3.7 (2.6, 4.9)                        | <b>&lt;.001</b> |
| White                                                                          | Reference                             |                 | Reference                             |                 |
| Other <sup>a</sup>                                                             | 0.0 (-2.2, 2.2)                       | .99             | -0.6 (-3.0, 1.8)                      | .61             |
| <b>Delivery month</b>                                                          | 0.1 (0.0, 0.2)                        | .06             | 0.7 (0.5, 0.8)                        | <b>&lt;.001</b> |
| <b>Time period</b>                                                             |                                       |                 |                                       |                 |
| Pre-pandemic                                                                   | Reference                             |                 | Reference                             |                 |
| Early-pandemic                                                                 | 1.2 (-1.0, 3.4)                       | .27             | 33.7 (27.8, 39.5)                     | <b>&lt;.001</b> |
| Late-pandemic                                                                  | 0.4 (-0.4, 1.2)                       | .34             | 22.2 (20.2, 24.2)                     | <b>&lt;.001</b> |
| <b>Level changes</b>                                                           |                                       |                 |                                       |                 |
| Level changes in early-pandemic compared to pre-pandemic by race and ethnicity |                                       |                 |                                       |                 |
| Asian                                                                          | 8.1 (4.9, 11.2)                       | <b>&lt;.001</b> | 10.3 (7.7, 13.0)                      | <b>&lt;.001</b> |
| Black                                                                          | 5.2 (0.5, 9.9)                        | <b>.03</b>      | 16.2 (11.3, 21.1)                     | <b>&lt;.001</b> |
| Hispanic                                                                       | 6.6 (4.3, 8.9)                        | <b>&lt;.001</b> | 15.0 (10.1, 19.8)                     | <b>&lt;.001</b> |
| White                                                                          | 4.8 (0.8, 8.9)                        | <b>.02</b>      | 16.2 (13.2, 19.1)                     | <b>&lt;.001</b> |
| Other                                                                          | 4.5 (-4.2, 13.2)                      | .31             | 15.4 (7.0, 23.8)                      | <b>&lt;.001</b> |
| Level changes in late-pandemic compared to pre-pandemic by race and ethnicity  |                                       |                 |                                       |                 |
| Asian                                                                          | -0.1 (-0.4, 0.1)                      | .33             | -2.7 (-3.5, -2.0)                     | <b>&lt;.001</b> |
| Black                                                                          | -0.1 (-1.0, 0.7)                      | .79             | -1.3 (-2.3, -0.3)                     | <b>.01</b>      |
| Hispanic                                                                       | -0.3 (-1.1, 0.4)                      | .40             | -1.0 (-1.6, -0.3)                     | <b>.002</b>     |
| White                                                                          | 0.0 (0.0, 0.1)                        | .35             | -3.0 (-3.3, -2.8)                     | <b>&lt;.001</b> |
| Other                                                                          | 0.0 (-0.2, 0.3)                       | .91             | -2.5 (-4.1, -0.9)                     | <b>.002</b>     |
| <b>Changes in monthly trend</b>                                                |                                       |                 |                                       |                 |
| Changes in monthly trends between race and ethnicity groups in pre-pandemic    |                                       |                 |                                       |                 |
| Asian                                                                          | -0.1 (-0.2, 0.1)                      | .54             | 0.0 (-0.5, 0.4)                       | .84             |
| Black                                                                          | 0.1 (-0.2, 0.5)                       | .47             | -0.3 (-1.0, 0.4)                      | .40             |
| Hispanic                                                                       | 0.2 (-0.1, 0.4)                       | .24             | -0.3 (-0.7, 0.2)                      | .22             |
| White                                                                          | Reference                             |                 | Reference                             |                 |
| Other                                                                          | -0.1 (-0.5, 0.3)                      | .75             | 0.0 (-0.9, 0.9)                       | .99             |
| Changes in monthly trends between race and ethnicity groups in early-pandemic  |                                       |                 |                                       |                 |
| Asian                                                                          | -1.8 (-7.0, 3.4)                      | .49             | 6.7 (-2.2, 15.6)                      | .14             |
| Black                                                                          | -1.1 (-5.7, 3.5)                      | .64             | -4.4 (-17.9, 9.2)                     | .53             |
| Hispanic                                                                       | 2.7 (-1.0, 6.3)                       | .15             | -12.0 (-20.5, -3.5)                   | <b>.006</b>     |
| White                                                                          | Reference                             |                 | Reference                             |                 |
| Other                                                                          | -1.0 (-11.5, 9.5)                     | .85             | -2.3 (-24.5, 20.0)                    | .84             |
| Changes in monthly trends between race and ethnicity groups in late-pandemic   |                                       |                 |                                       |                 |
| Asian                                                                          | -0.1 (-0.2, 0.0)                      | .17             | 0.1 (-0.3, 0.6)                       | .54             |
| Black                                                                          | 0.1 (-0.1, 0.2)                       | .21             | 1.1 (0.6, 1.6)                        | <b>&lt;.001</b> |
| Hispanic                                                                       | 0.03 (-0.1, 0.1)                      | .56             | 1.3 (0.9, 1.6)                        | <b>&lt;.001</b> |
| White                                                                          | Reference                             |                 | Reference                             |                 |

|                                               |                    |                 |                      |                 |
|-----------------------------------------------|--------------------|-----------------|----------------------|-----------------|
| Other                                         | -0.1 (-0.2, 0.1)   | .42             | 0.4 (-0.2, 1.0)      | .23             |
| <b>Age</b>                                    |                    |                 |                      |                 |
| <18                                           | 2.4 (-2.0, 6.7)    | .29             | 1.7 (-4.8, 8.1)      | .61             |
| 18-24                                         | 1.6 (0.1, 3.1)     | <b>.04</b>      | 0.3 (-1.1, 1.7)      | .65             |
| 25-34                                         | Reference          |                 | Reference            |                 |
| 35-44                                         | 0.1 (-0.3, 0.6)    | .57             | 0.9 (0.0, 1.8)       | .06             |
| ≥45                                           | -1.6 (-3.6, 0.5)   | .14             | -0.1 (-5.2, 5.0)     | .97             |
| <b>Marital status</b>                         |                    |                 |                      |                 |
| Single                                        | 2.3 (0.7, 3.9)     | <b>.004</b>     | 2.5 (1.6, 3.5)       | <b>&lt;.001</b> |
| Married/life partner                          | Reference          |                 | Reference            |                 |
| Other <sup>a</sup>                            | 2.1 (0.0, 4.1)     | <b>.05</b>      | 5.1 (3.0, 7.2)       | <b>&lt;.001</b> |
| <b>PNC attendance</b>                         |                    |                 |                      |                 |
| Delayed PNC                                   | 3.78 (3.42, 4.17)  | <b>&lt;.001</b> | 11.89 (11.19, 12.63) | <b>&lt;.001</b> |
| Timely PNC                                    | Reference          |                 | Reference            |                 |
| <b>GA at delivery</b>                         |                    |                 |                      |                 |
| <28                                           | 1.7 (-1.7, 5.0)    | .34             | -4.1 (-11.3, 3.2)    | .27             |
| 28-36                                         | 1.3 (0.1, 2.6)     | <b>.04</b>      | -2.9 (-4.4, -1.4)    | <b>&lt;.001</b> |
| ≥37                                           | Reference          |                 | Reference            |                 |
| <b>Delivery mode</b>                          |                    |                 |                      |                 |
| Natural Vaginal                               | Reference          |                 | Reference            |                 |
| Cesarean                                      | 0.2 (-0.2, 0.6)    | .30             | -2.9 (-3.7, -2.1)    | <b>&lt;.001</b> |
| VBAC                                          | 0.6 (-0.7, 1.9)    | .37             | -0.8 (-4.2, 2.7)     | .67             |
| Other                                         | -1.1 (-35.6, 33.5) | .95             | -11.4 (-23.5, 0.7)   | .07             |
| <b>Severe Morbidity<sup>b</sup></b>           |                    |                 |                      |                 |
| Positive                                      | 0.0 (-1.4, 1.4)    | .99             | 0.1 (-3.4, 3.5)      | .97             |
| Negative                                      | Reference          |                 | Reference            |                 |
| <b>Diabetes</b>                               |                    |                 |                      |                 |
| Positive                                      | 0.9 (0.1, 1.7)     | <b>.03</b>      | -2.7 (-3.9, -1.5)    | <b>&lt;.001</b> |
| Negative                                      | Reference          |                 | Reference            |                 |
| <b>Hypertension</b>                           |                    |                 |                      |                 |
| Positive                                      | -0.3 (-0.9, 0.3)   | .33             | -3.5 (-4.5, -2.5)    | <b>&lt;.001</b> |
| Negative                                      | Reference          |                 | Reference            |                 |
| <b>Depression</b>                             |                    |                 |                      |                 |
| Positive                                      | 2.1 (0.3, 4.0)     | <b>.02</b>      | -1.9 (-3.1, -0.8)    | <b>.001</b>     |
| Negative                                      | Reference          |                 | Reference            |                 |
| <b>Smoking</b>                                |                    |                 |                      |                 |
| Positive                                      | 3.1 (0.1, 6.0)     | <b>.04</b>      | 2.8 (-0.7, 6.2)      | .12             |
| Negative                                      | Reference          |                 | Reference            |                 |
| <b>County-level vulnerability<sup>c</sup></b> |                    |                 |                      |                 |
| Bottom quartile                               | Reference          |                 | Reference            |                 |
| Second quartile                               | -5.3 (-9.3, -1.3)  | <b>.01</b>      | 7.2 (4.2, 10.3)      | <b>&lt;.001</b> |
| Third quartile                                | -0.9 (-3.8, 2.1)   | .57             | -2.2 (-5.4, 1.0)     | .17             |
| Top quartile                                  | -4.6 (-8.2, -0.9)  | <b>.01</b>      | 3.0 (-0.1, 6.0)      | .06             |
| <b>Hospital</b>                               |                    |                 |                      |                 |
| BWH                                           | Reference          |                 | Reference            |                 |
| CDH                                           | -4.4 (-5.7, -3.1)  | <b>&lt;.001</b> | 10.1 (7.5, 12.8)     | <b>&lt;.001</b> |
| MGH                                           | 0.2 (-0.6, 1.0)    | .58             | 15.7 (14.8, 16.7)    | <b>&lt;.001</b> |
| MVH                                           | -9.1 (-10.2, -8.0) | <b>&lt;.001</b> | 84.4 (81.7, 87.1)    | <b>&lt;.001</b> |
| NCH                                           | 1.5 (-2.1, 5.1)    | .41             | -2.3 (-6.4, 1.9)     | .29             |
| NWH                                           | -7.1 (-8.1, -6.2)  | <b>&lt;.001</b> | 26.7 (25.8, 27.6)    | <b>&lt;.001</b> |
| SLM                                           | -4.7 (-5.8, -3.6)  | <b>&lt;.001</b> | 22.7 (21.3, 24.1)    | <b>&lt;.001</b> |
| WDH                                           | -9.1 (-10.1, -8.0) | <b>&lt;.001</b> | 26.5 (24.7, 28.3)    | <b>&lt;.001</b> |

Note. Pre-pandemic: January 2019-December 2019; early-pandemic: January 2020-March 2020; late-pandemic: April 2020-November 2021.

<sup>a</sup>Other racial groups include American Indian or Alaska Native, Native Hawaiian or Other Pacific Islander, and multiple races.

<sup>b</sup>Severe maternal morbidity was identified with the CDC list of 21 indicators, including acute myocardial infarction, aneurysm, acute renal failure, adult respiratory distress syndrome, amniotic fluid embolism, cardiac arrest/ventricular fibrillation, conversion of cardiac rhythm, disseminated intravascular coagulation, eclampsia, heart failure/arrest during surgery or procedure, puerperal cerebrovascular disorders, pulmonary edema/acute heart failure, severe anesthesia complications, sepsis, shock, sickle cell disease with crisis, air and thrombotic embolism, blood products transfusion, hysterectomy, temporary tracheostomy, and ventilation.

<sup>c</sup>Social vulnerability was indicated by the social vulnerability index and was categorized into quartiles. Higher quartile indicates greater vulnerability.

*Abbreviations:* GA-gestational age; PNC-prenatal care; BWH-Brigham and Women's Hospital; CDH-Cooley Dickinson Hospital; MGH-Massachusetts General Hospital; MVH-Martha's Vineyard Hospital; NCH-Nantucket Cottage Hospital; NWH-Newton-Wellesley Hospital; SLM-Salem Hospital; WDH-Wentworth-Douglass Hospital.
